# Supplementary material for: Deciphering supramolecular isomerization in coordination polymers: connected molecular squares vs. fused hexagons
Source: Royal Society of Chemistry journal article supplement (doi:10.1039/d0dt04196c), 2020-12-22
Supplement: d0dt04196c1.pdf [file d0dt04196c1.pdf]

## Electronic Supplementary Information

### Deciphering the supramolecular isomerization in coordination polymers: connected molecular squares vs fused hexagons

Vijay Gupta<sup>a</sup>, Biswajit Laha<sup>a</sup>, Sadhika Khullar<sup>b\*</sup> and Sanjay K. Mandal<sup>a\*</sup>

*<sup>a</sup>Department of Chemical Sciences, Indian Institute of Science Education and Research  
Mohali, Sector 81, Manauli PO, S.A.S. Nagar, Mohali (Punjab) 140306, INDIA*

*<sup>b</sup>Department of Chemistry, Dr. B R Ambedkar National Institute of Technology, Jalandhar,  
Punjab 144011, India*

Authors for correspondence:

Prof. Sanjay K. Mandal, E-mail: [sanjaymandal@iisrmohali.ac.in](mailto:sanjaymandal@iisrmohali.ac.in)

Dr. Sadhika Khullar, E-mail: [khullars@nitj.ac.in](mailto:khullars@nitj.ac.in)

## Table of Contents

| Item              | Description                                                                                                                                                                      | Page No. |
|-------------------|----------------------------------------------------------------------------------------------------------------------------------------------------------------------------------|----------|
| <b>Section-S1</b> | ORTEP views of the asymmetric unit in <b>1-6</b> (Fig. S1-S7)                                                                                                                    | S3-S6    |
| <b>Section-S2</b> | Additional crystal structure figures for <b>1a</b> , <b>5</b> and <b>6</b> (Fig. S8-S10)                                                                                         | S7-S8    |
| <b>Section-S3</b> | FTIR spectra for <b>1a-6</b> (Fig. S11-S16)                                                                                                                                      | S9- S14  |
| <b>Section-S4</b> | PXRD patterns of the as-synthesized samples of <b>1a-6</b> compared with their respective simulated powder patterns obtained from their single crystal structures (Fig. S17-S22) | S15- S17 |
| <b>Section-S5</b> | Selected bond lengths, bond angles and Hydrogen bonding parameters for <b>1-6</b> (Table S1- S2)                                                                                 | S18- S20 |

Section-S1

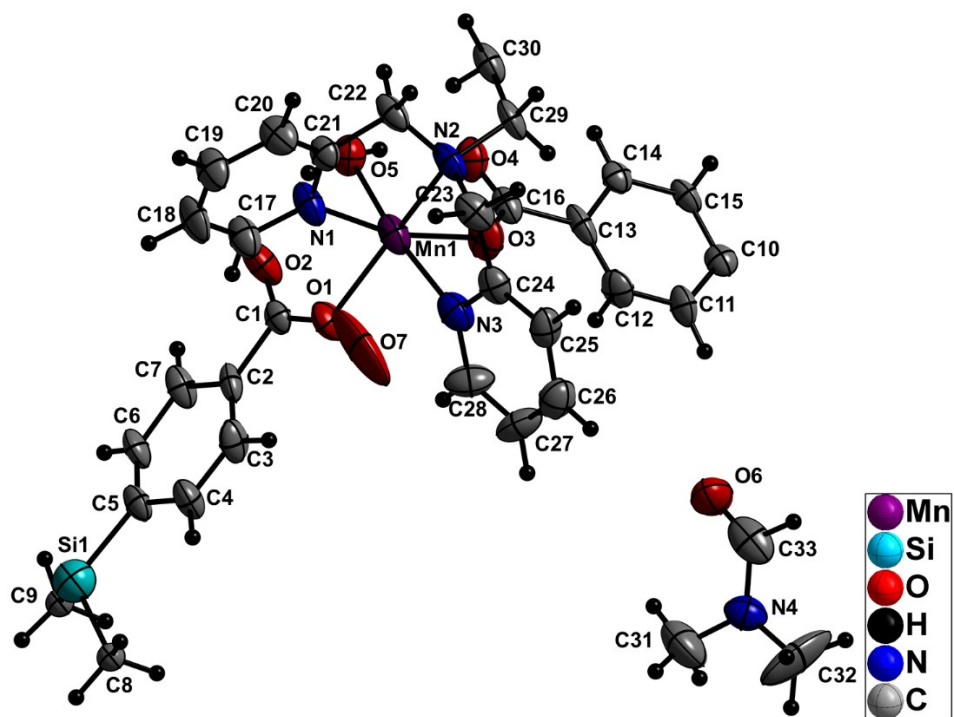

**Fig. S1** Coordination environment and the content of asymmetric unit in **1**.

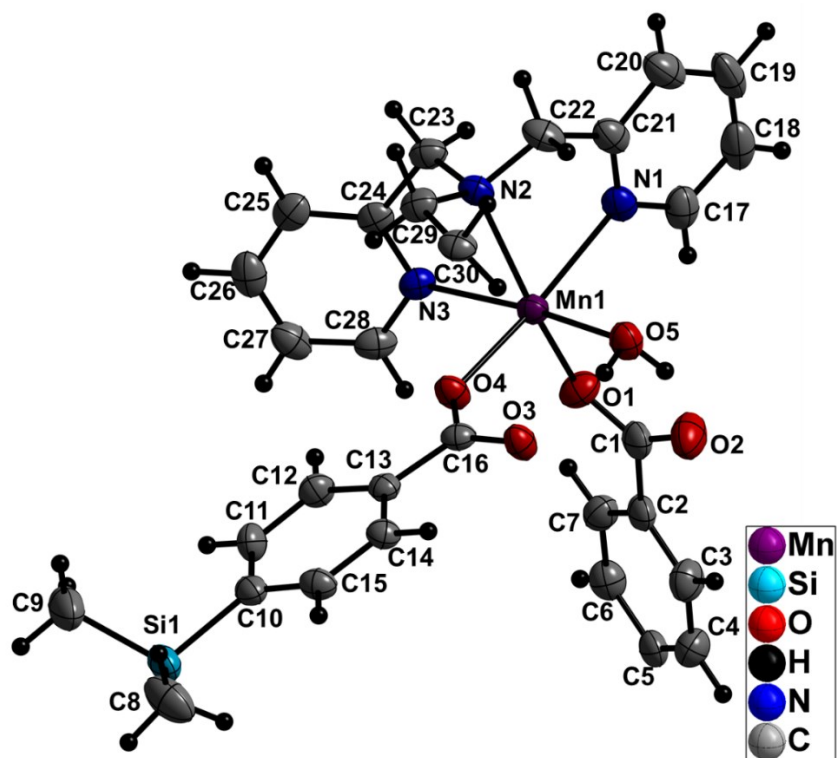

**Fig. S2** Coordination environment and the content of asymmetric unit in **1a**.

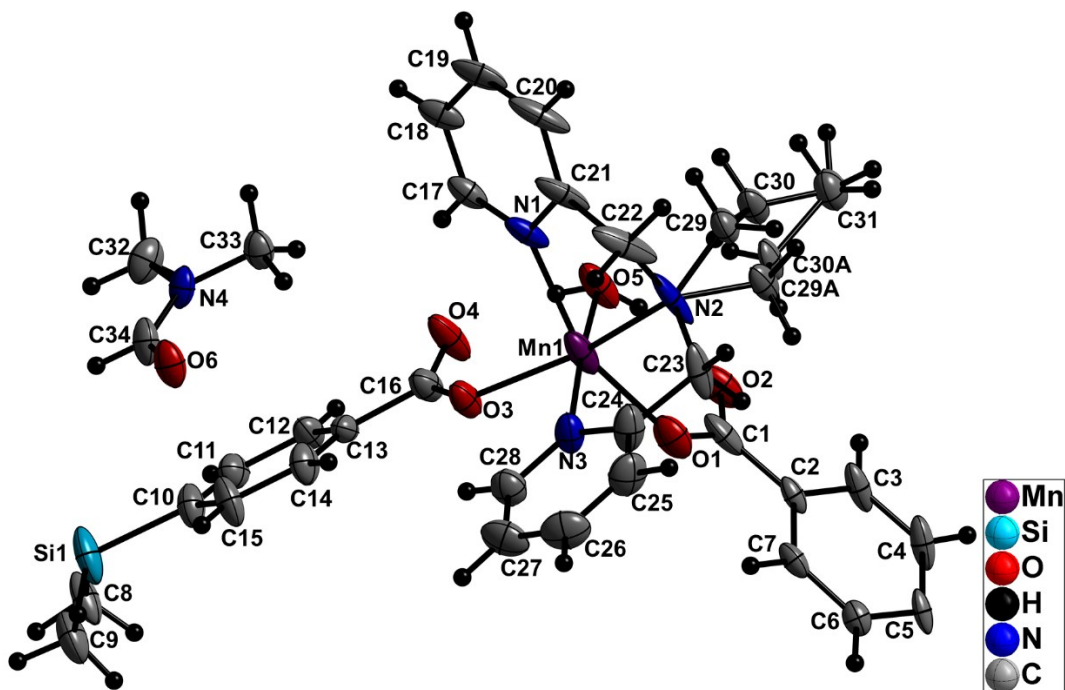

Fig. S3 Coordination environment and the content of asymmetric unit in 2.

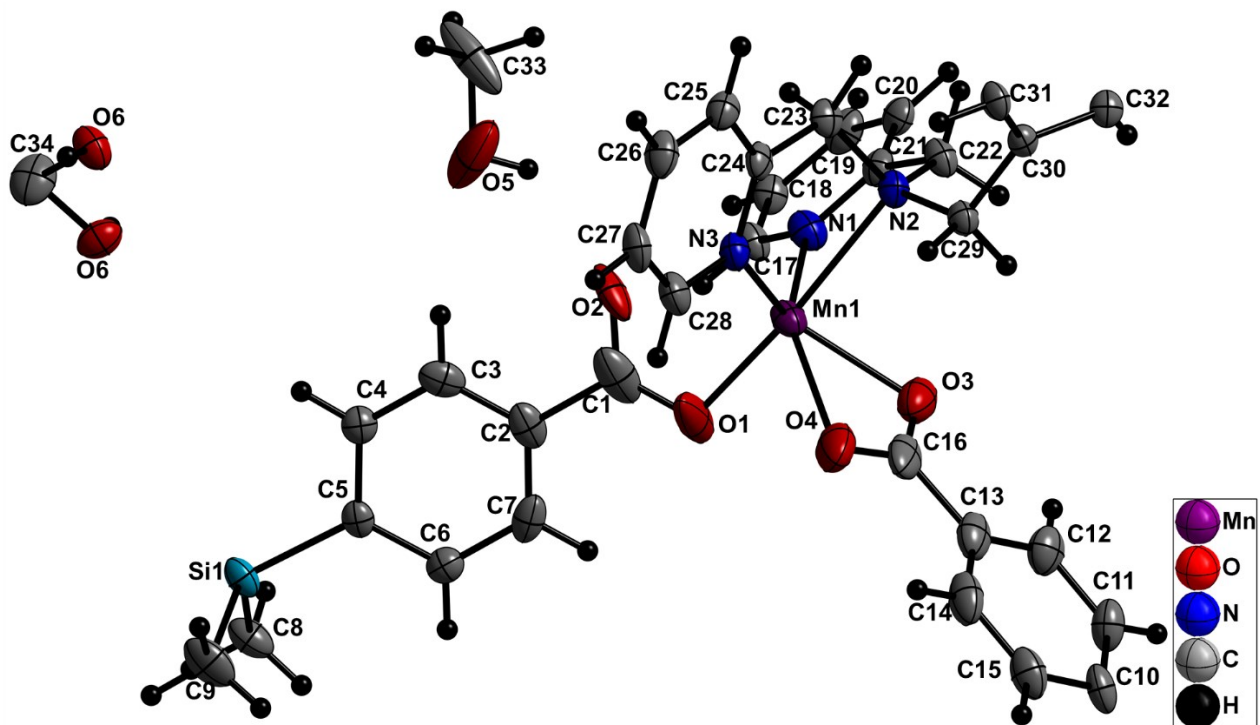

Fig. S4 Coordination environment and the content of asymmetric unit in 3.

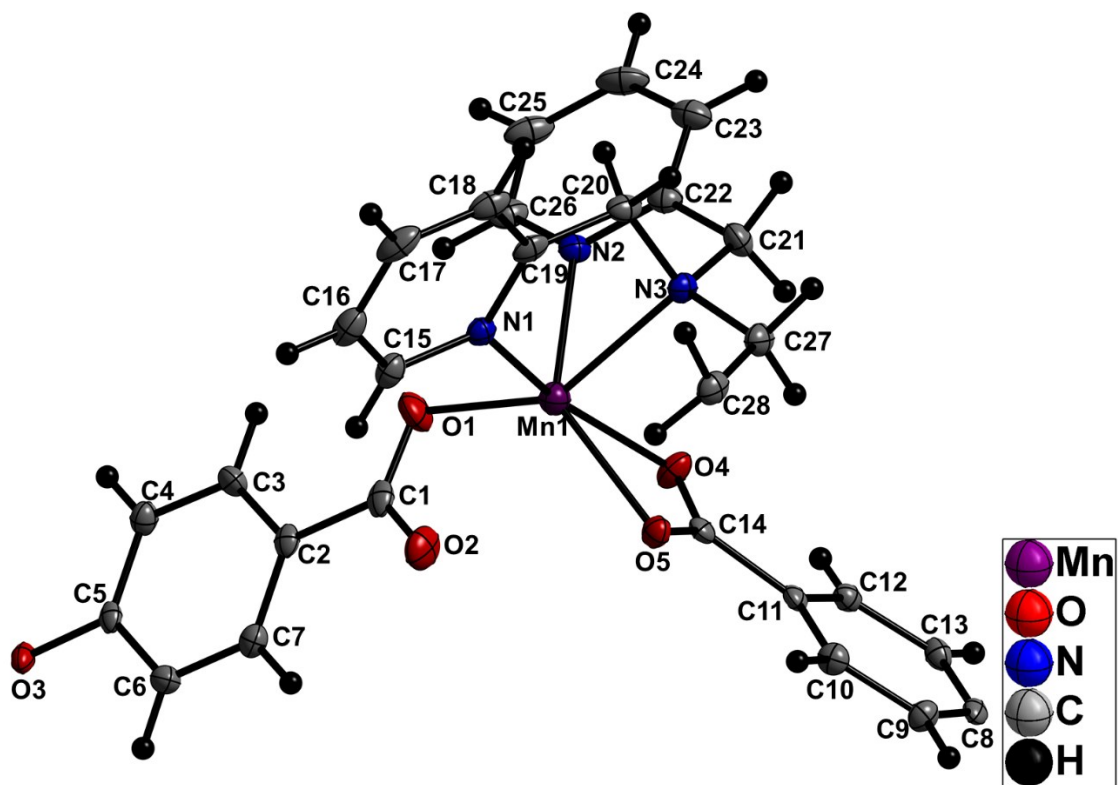

Fig. S5 Coordination environment and the content of asymmetric unit in 4.

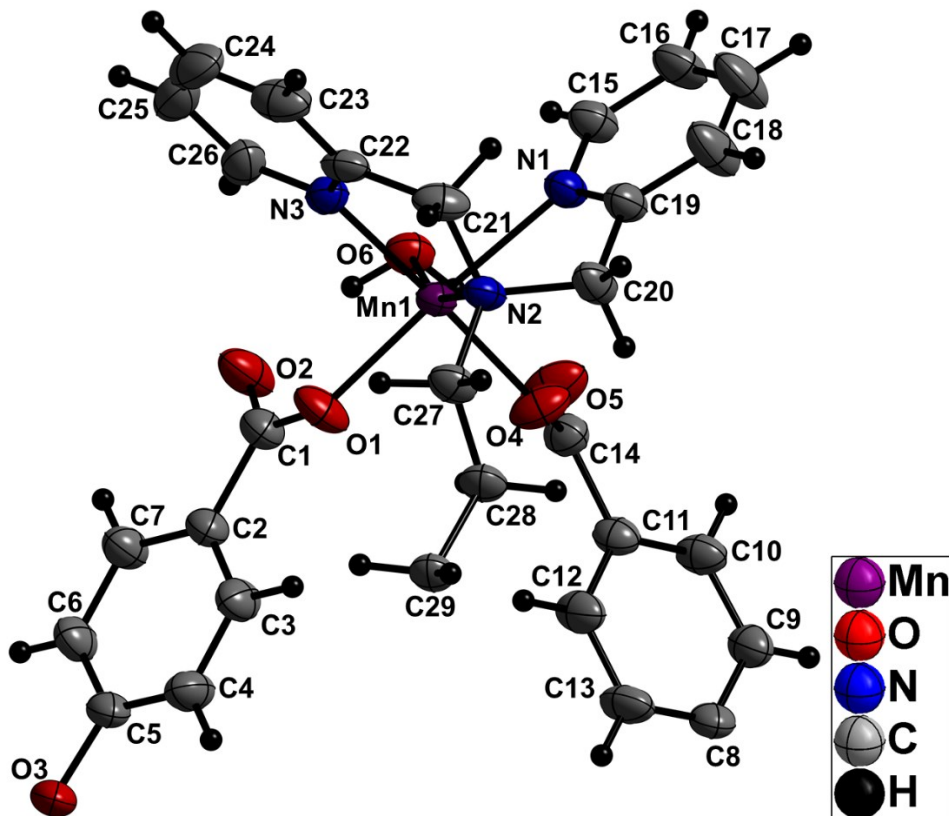

Fig. S6 Coordination environment and the content of asymmetric unit in 5.

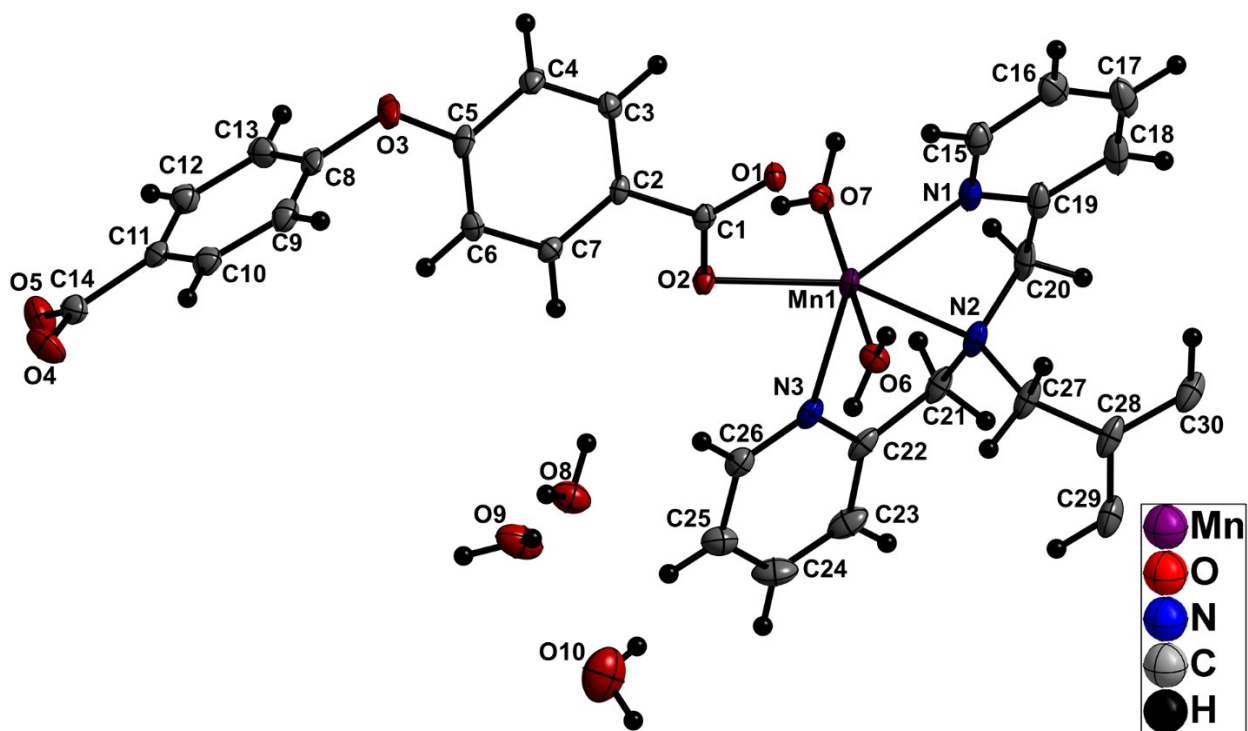

**Fig. S7** Coordination environment and the content of asymmetric unit in 6.

Section-S2

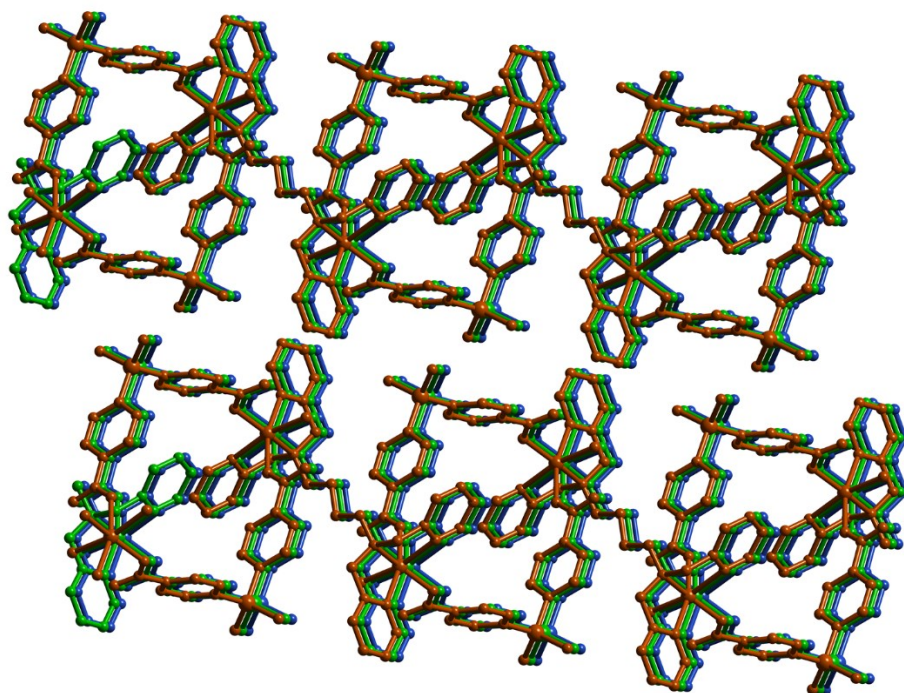

**Fig. S8** Stacking of connected molecular squares in **1a**.

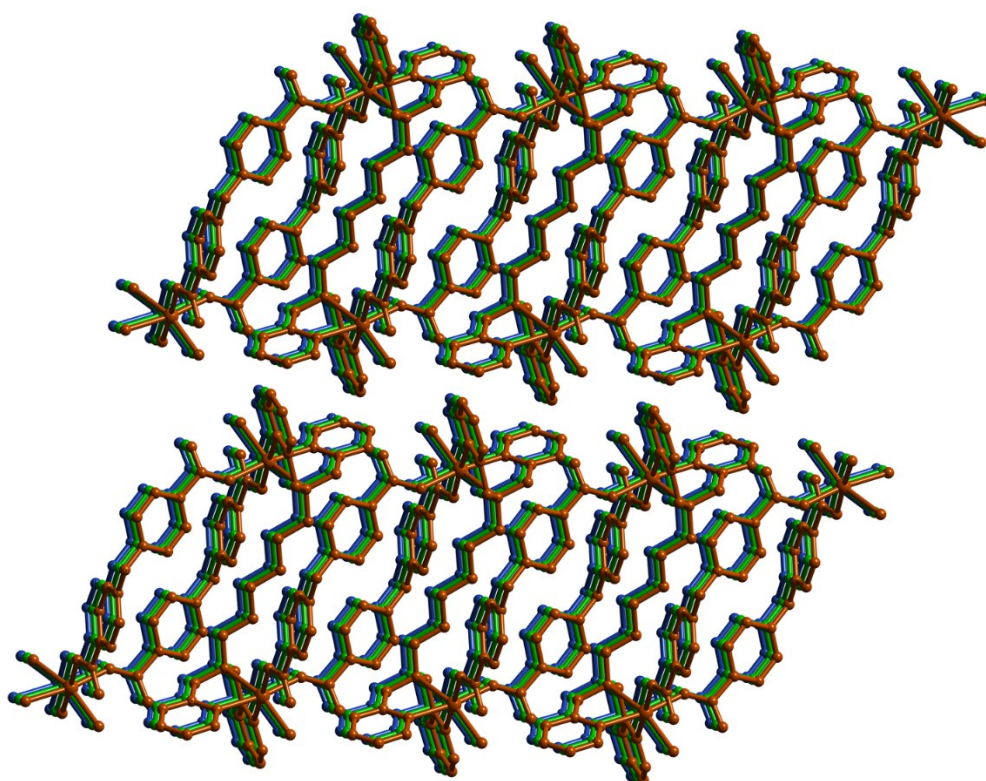

**Fig. S9** Stacking of connected molecular squares in **5**.

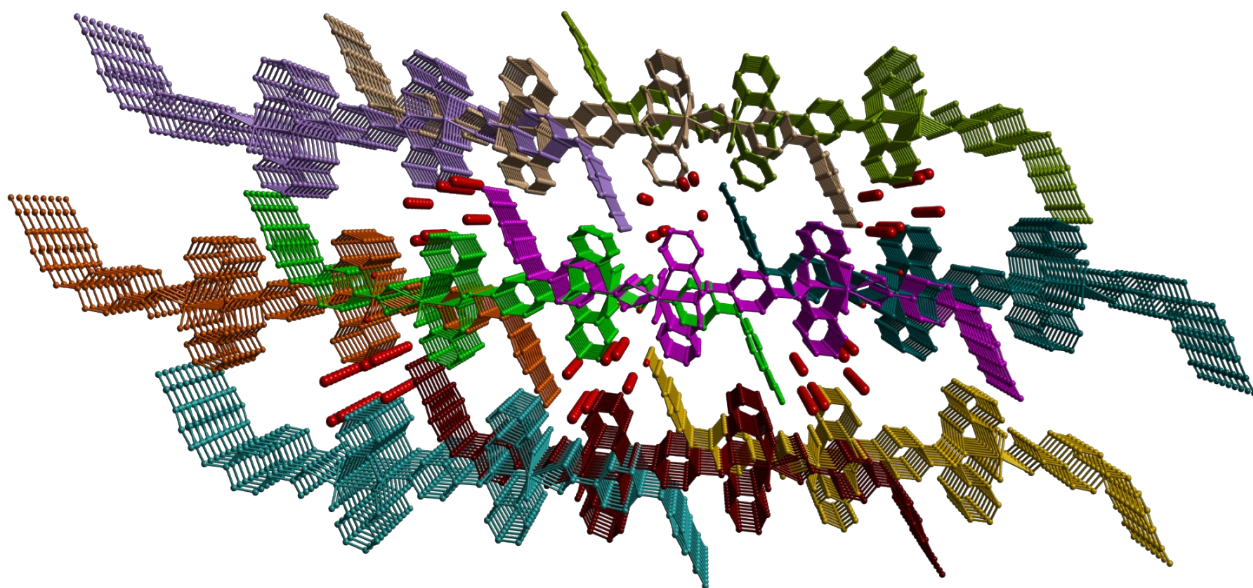

**Fig. S10** Overall 3D supramolecular architecture formed by the intermolecular Hydrogen bonding in **6**.



Section-S3

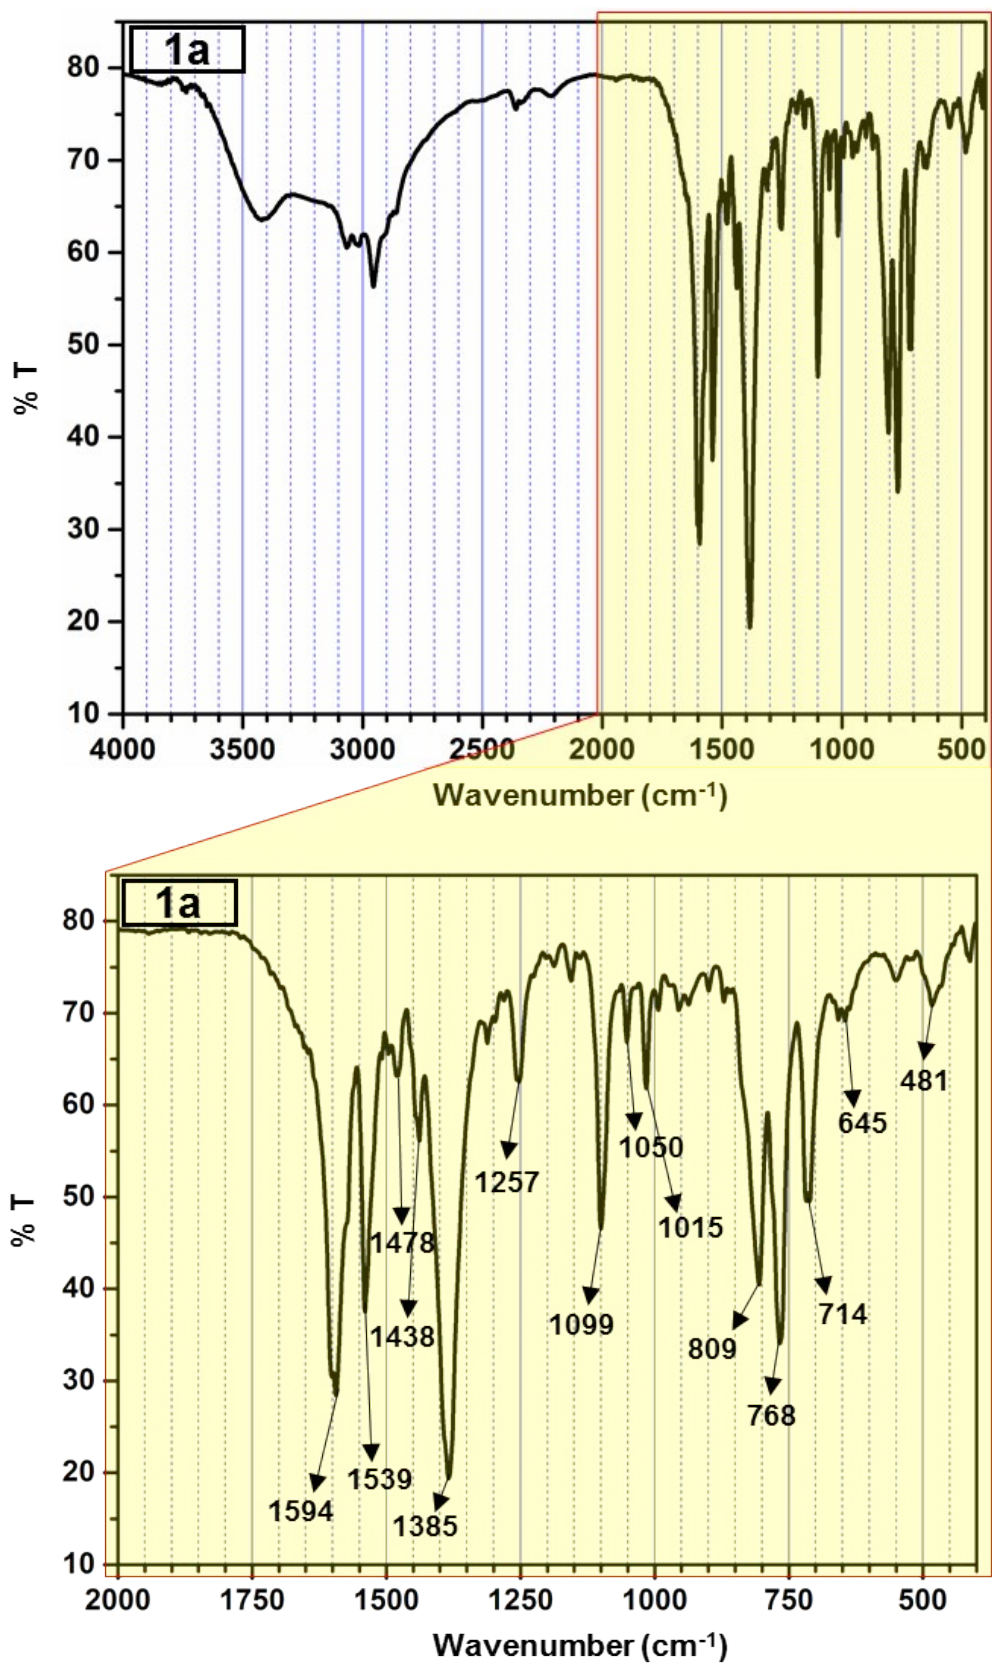

Fig. S11 FTIR spectrum of 1a.

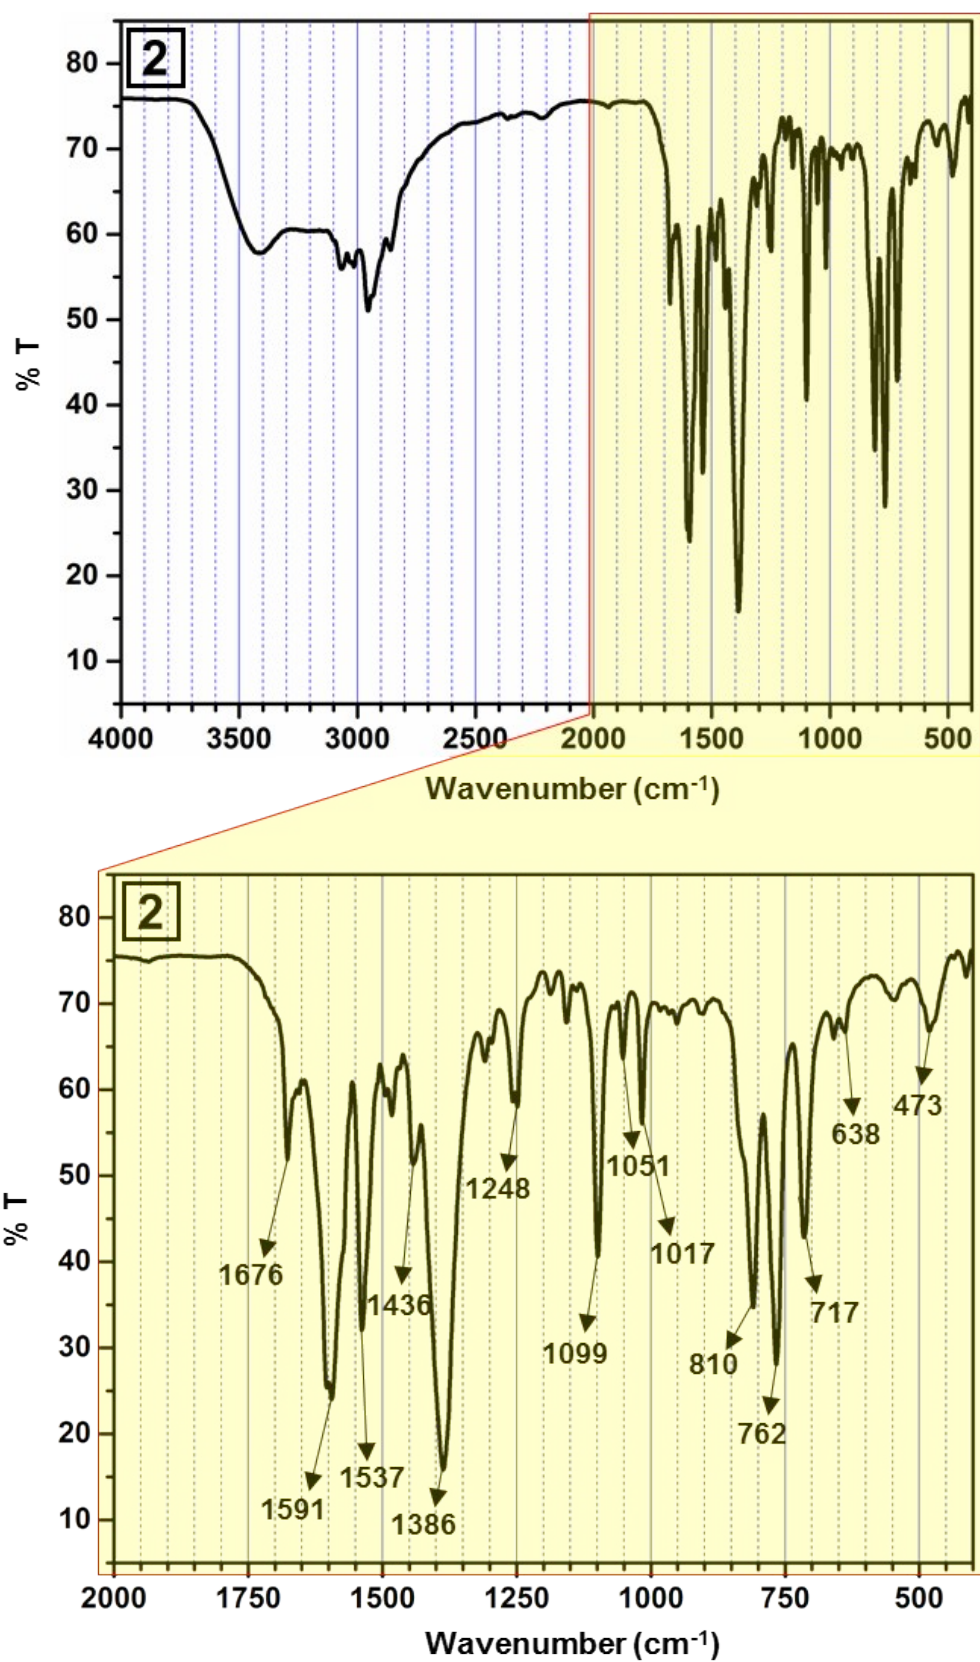

Fig. S12 FTIR spectrum of 2.

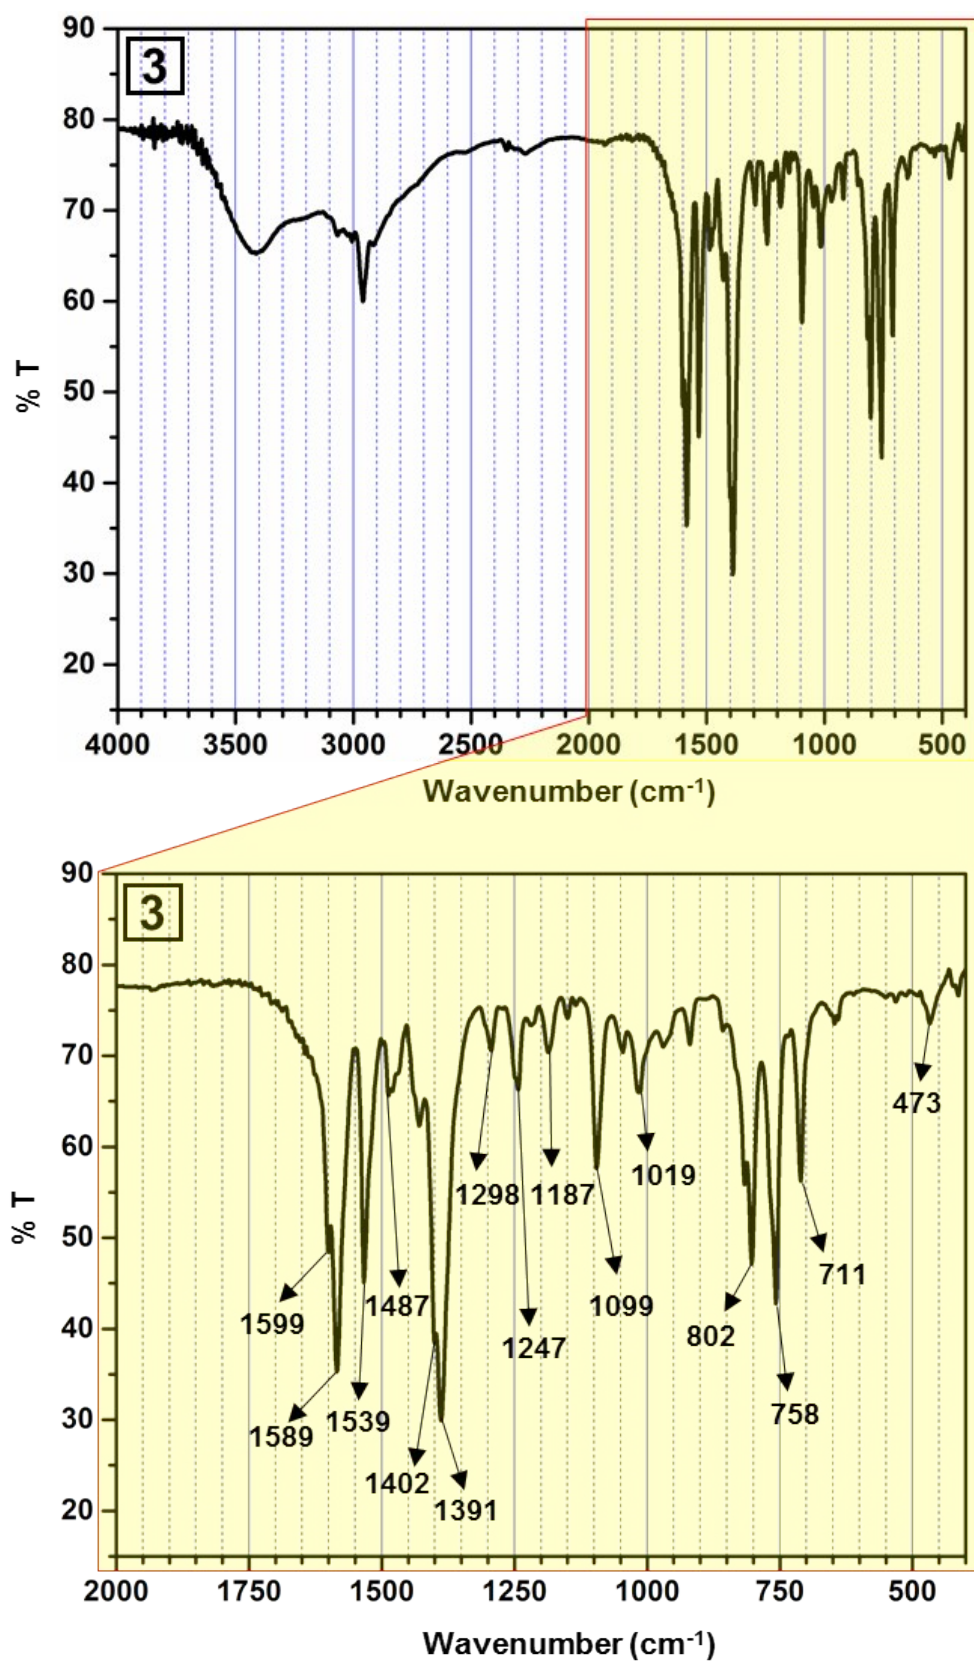

Fig. S13 FTIR spectrum of 3.

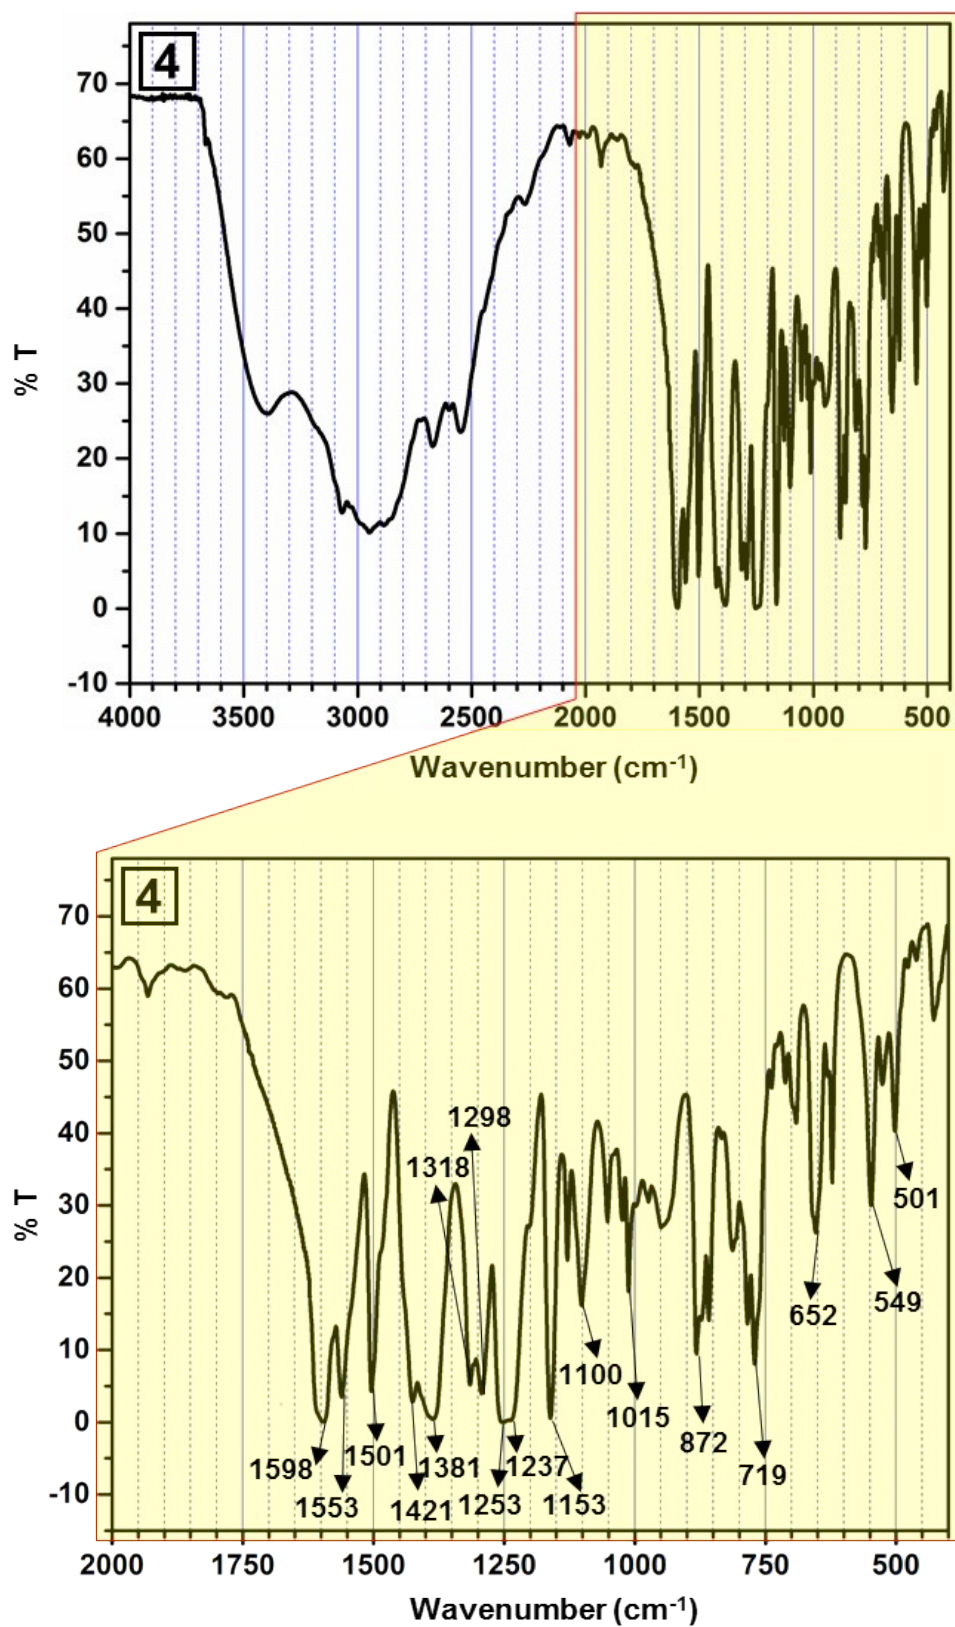

Fig. S14 FTIR spectrum of 4.

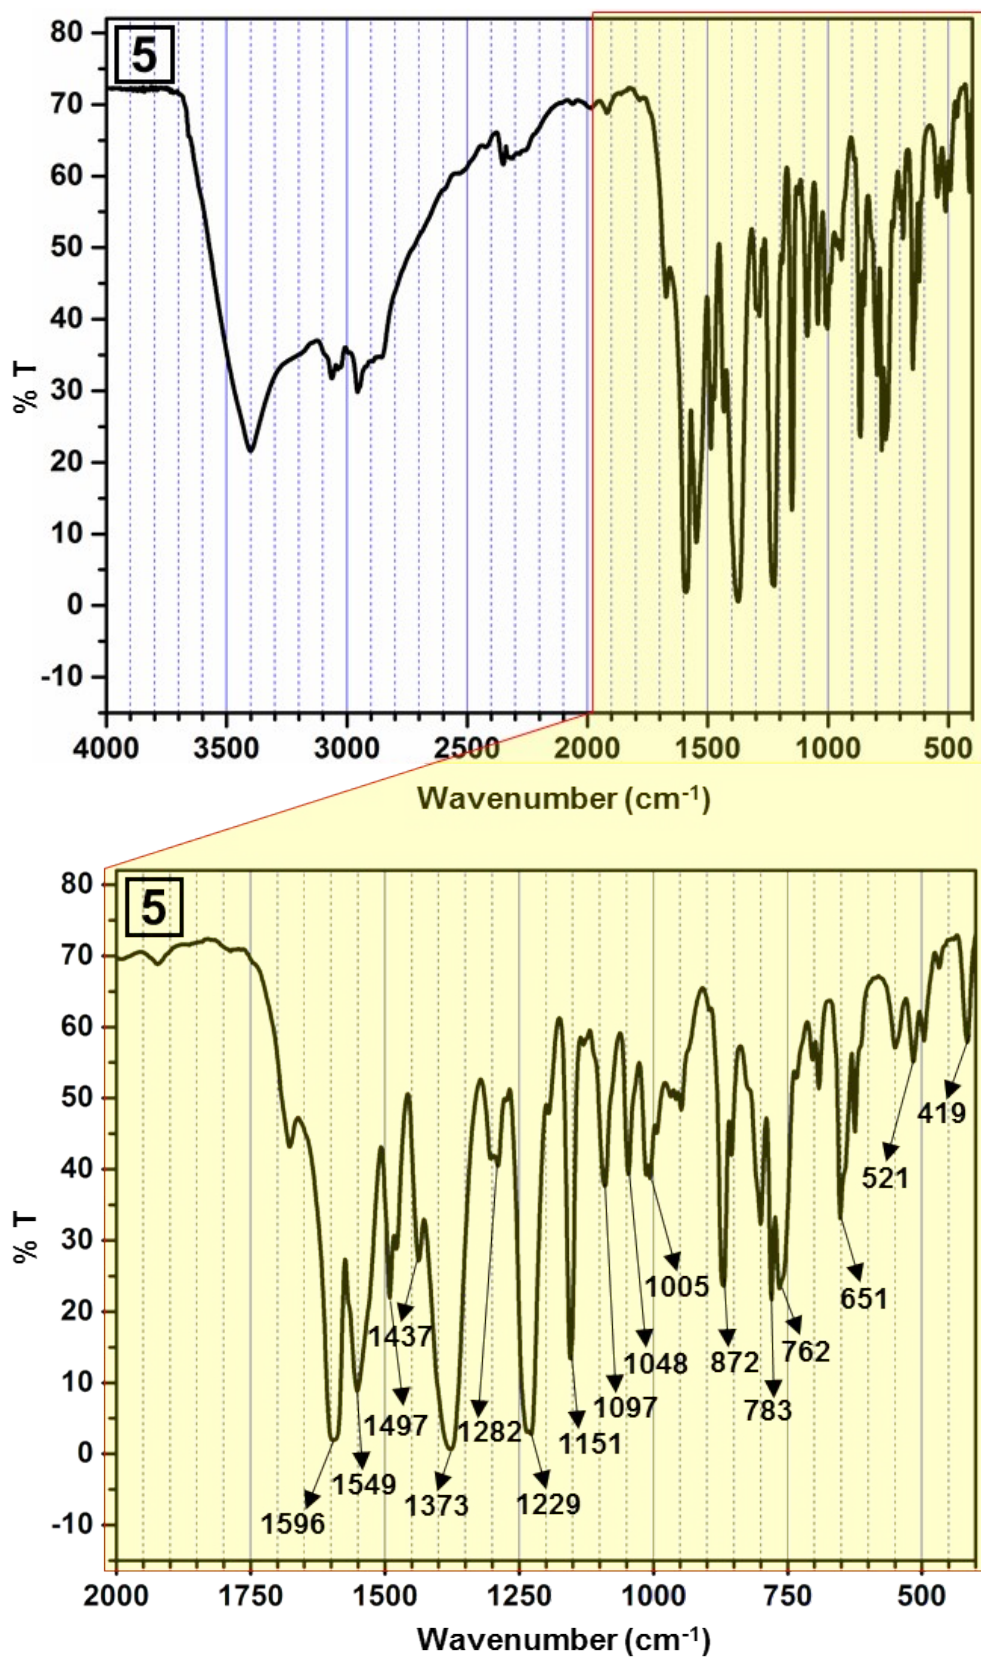

Fig. S15 FTIR spectrum of 5.

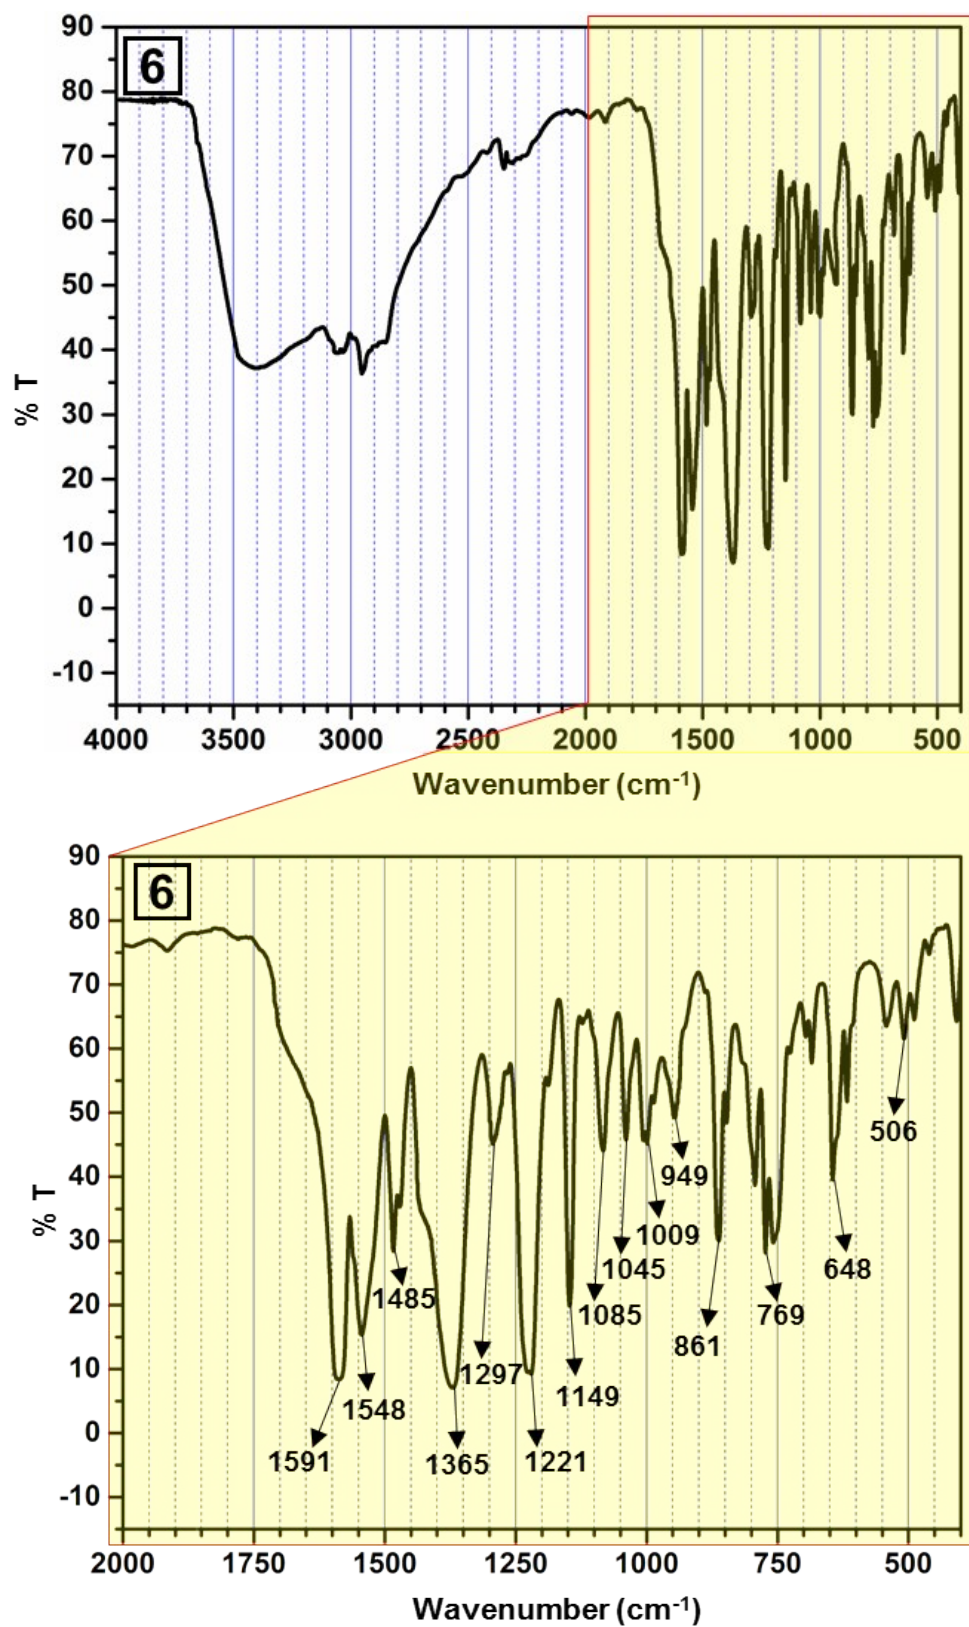

Fig. S16 FTIR spectrum of 6.

**Section-S4**

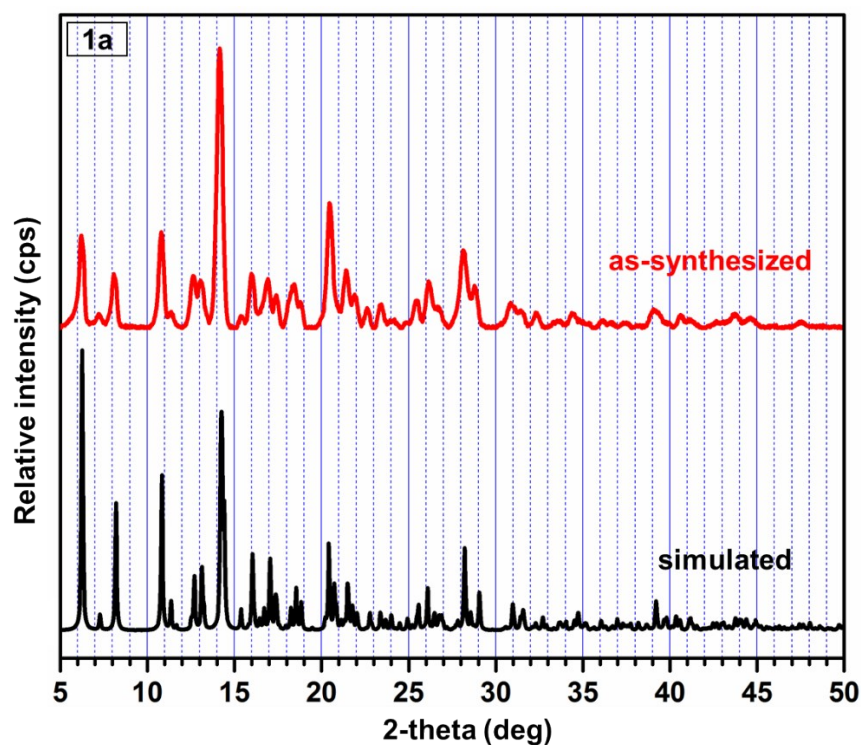

**Fig. S17** PXRd patterns of the as synthesized **1a** compared with the simulated powder patterns obtained from single crystal structures.

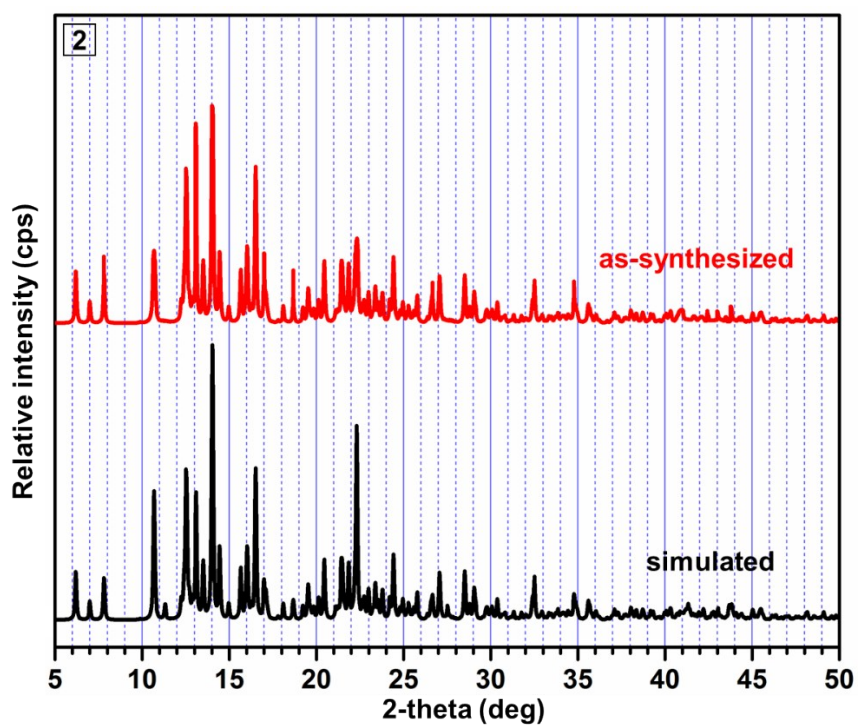

**Fig. S18** PXRd patterns of the as synthesized **2** compared with the simulated powder patterns obtained from single crystal structures.

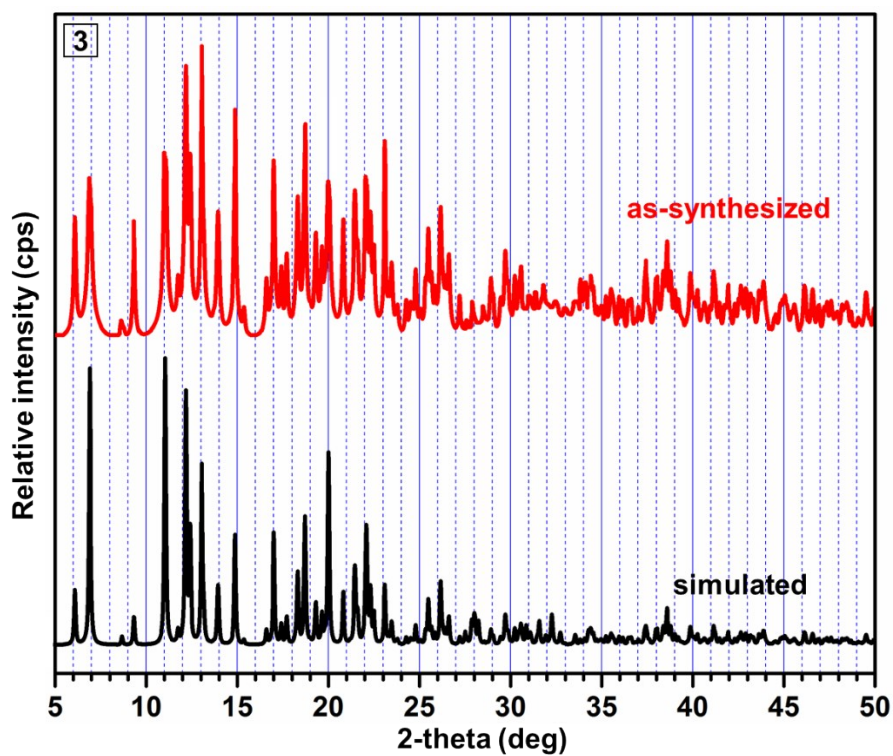

**Fig. S19** PXRd patterns of the as synthesized **3** compared with the simulated powder patterns obtained from single crystal structures.

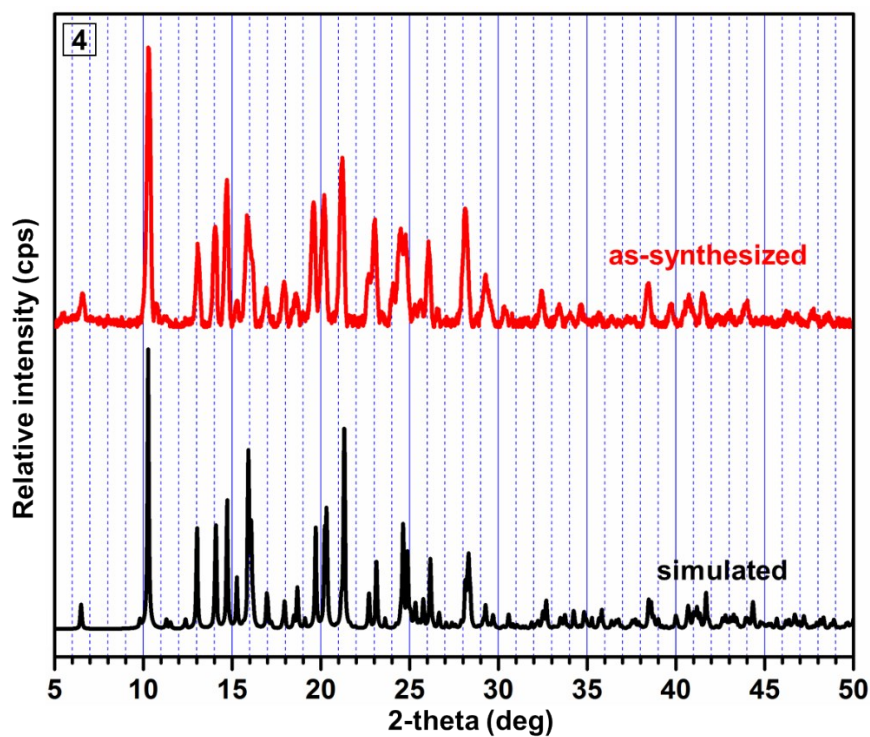

**Fig. S20** PXRd patterns of the as synthesized **4** compared with the simulated powder patterns obtained from single crystal structures.



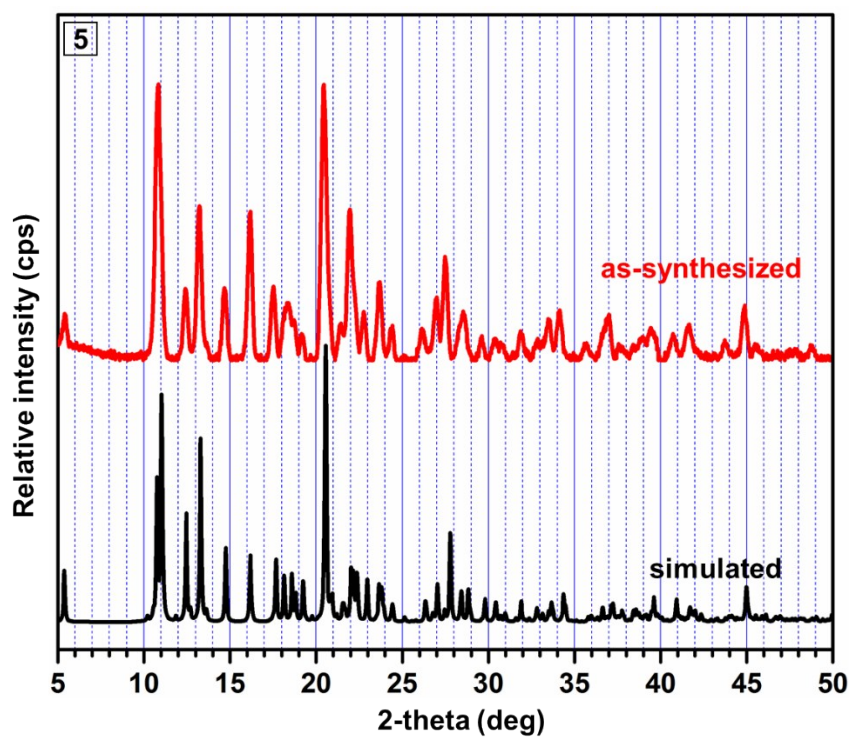

**Fig. S21** PXR D patterns of the as synthesized 5 compared with the simulated powder patterns obtained from single crystal structures.

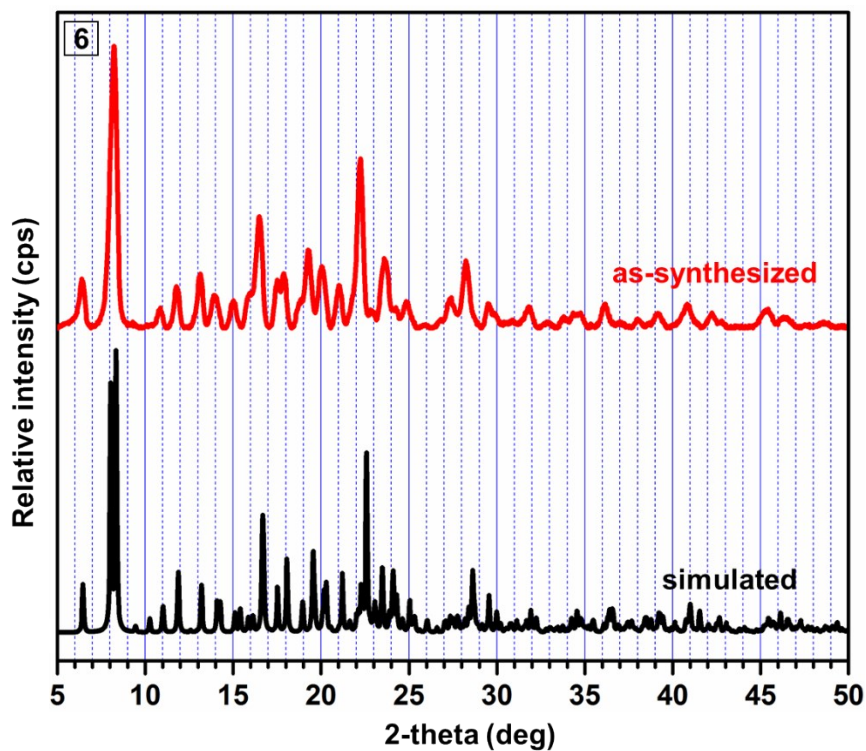

**Fig. 22** PXR D patterns of the as synthesized 6 compared with the simulated powder patterns obtained from single crystal structures.

**Section-S5****Table S1** Selected bond lengths (Å) and bond angles (degree) in **1-6**.

| <b>1</b> |     |          |          |    |           |    |          |
|----------|-----|----------|----------|----|-----------|----|----------|
| Mn1      | O1  | 2.109(8) | Mn1      | O3 | 2.116(8)  |    |          |
| Mn1      | O5  | 2.193(9) | Mn1      | N1 | 2.259(9)  |    |          |
| Mn1      | N2  | 2.361(9) | Mn1      | N3 | 2.195(11) |    |          |
| O1       | Mn1 | O3       | 103.8(4) | O1 | Mn1       | O5 | 94.5(3)  |
| O1       | Mn1 | N1       | 90.6(4)  | O1 | Mn1       | N2 | 154.0(3) |
| O1       | Mn1 | N3       | 89.0(3)  | O3 | Mn1       | O5 | 86.2(3)  |
| O3       | Mn1 | N1       | 165.5(3) | O3 | Mn1       | N2 | 95.6(4)  |
| O3       | Mn1 | N3       | 84.6(3)  | O5 | Mn1       | N1 | 90.8(3)  |
| O5       | Mn1 | N2       | 104.1(3) | O5 | Mn1       | N3 | 170.7(3) |
| N1       | Mn1 | N2       | 71.4(4)  | N3 | Mn1       | N1 | 97.7(3)  |
| N3       | Mn1 | N2       | 75.5(3)  |    |           |    |          |

Symmetry codes:

(#1) +x,+y,1+z; (#2) +x,+y,-1+z; (#3) -x,-y,-z

| <b>1a</b> |     |            |           |        |            |    |           |
|-----------|-----|------------|-----------|--------|------------|----|-----------|
| Mn1       | O1  | 2.1222(17) | Mn1       | O4(#1) | 2.1355(16) |    |           |
| Mn1       | O5  | 2.2425(17) | Mn1       | N1     | 2.289(2)   |    |           |
| Mn1       | N2  | 2.358(2)   | Mn1       | N3     | 2.3026(19) |    |           |
| O1        | Mn1 | O4(#1)     | 98.46(7)  | O1     | Mn1        | O5 | 95.43(7)  |
| O1        | Mn1 | N1         | 95.98(7)  | O1     | Mn1        | N2 | 159.21(7) |
| O1        | Mn1 | N3         | 91.92(7)  | O41    | Mn1        | O5 | 87.37(6)  |
| O41       | Mn1 | N1         | 163.74(6) | O41    | Mn1        | N2 | 95.73(7)  |
| O41       | Mn1 | N3         | 81.82(7)  | O5     | Mn1        | N1 | 83.87(7)  |
| O5        | Mn1 | N2         | 100.34(7) | O5     | Mn1        | N3 | 167.73(6) |
| N1        | Mn1 | N2         | 72.52(7)  | N1     | Mn1        | N3 | 105.16(7) |
| N3        | Mn1 | N2         | 75.12(7)  |        |            |    |           |

Symmetry codes:

(#1) -x,1-y,1-z;

| <b>2</b> |     |          |            |        |          |    |            |
|----------|-----|----------|------------|--------|----------|----|------------|
| Mn1      | O1  | 2.124(3) | Mn1        | O3(#1) | 2.144(2) |    |            |
| Mn1      | O5  | 2.227(3) | Mn1        | N1     | 2.271(4) |    |            |
| Mn1      | N2  | 2.404(4) | Mn1        | N3     | 2.257(3) |    |            |
| O1       | Mn1 | O3(#1)   | 106.99(10) | O1     | Mn1      | O5 | 87.88(11)  |
| O1       | Mn1 | N1       | 158.68(12) | O1     | Mn1      | N2 | 91.35(17)  |
| O1       | Mn1 | N3       | 86.09(11)  | O31    | Mn1      | O5 | 91.40(9)   |
| O31      | Mn1 | N1       | 93.29(12)  | O31    | Mn1      | N2 | 152.21(15) |
| O31      | Mn1 | N3       | 87.66(10)  | O5     | Mn1      | N1 | 85.08(12)  |
| O5       | Mn1 | N2       | 110.38(11) | O5     | Mn1      | N3 | 173.35(13) |
| N1       | Mn1 | N2       | 72.44(18)  | N3     | Mn1      | N1 | 101.54(12) |
| N3       | Mn1 | N2       | 72.62(12)  |        |          |    |            |

Symmetry codes:

(#1) +x,+y,1+z;

**Table S1** Continued:

---

**3**

---

|     |        |        |            |     |        |        |            |
|-----|--------|--------|------------|-----|--------|--------|------------|
| Mn1 | O1     |        | 2.182(4)   | Mn1 | O3(#1) |        | 2.179(3)   |
| Mn1 | O4(#1) |        | 2.408(4)   | Mn1 | N1     |        | 2.236(3)   |
| Mn1 | N2     |        | 2.430(3)   | Mn1 | N3     |        | 2.221(3)   |
| O1  | Mn1    | O4(#1) | 87.34(12)  | O1  | Mn1    | N1     | 93.33(13)  |
| O1  | Mn1    | N2     | 165.98(13) | O1  | Mn1    | N3     | 116.24(15) |
| O31 | Mn1    | O1     | 96.19(14)  | O31 | Mn1    | O4(#1) | 57.02(12)  |
| O31 | Mn1    | N1     | 94.27(13)  | O31 | Mn1    | N2     | 85.71(11)  |
| O31 | Mn1    | N3     | 129.57(12) | O41 | Mn1    | N2     | 105.16(11) |
| N1  | Mn1    | O4(#1) | 151.11(12) | N1  | Mn1    | N2     | 72.66(11)  |
| N3  | Mn1    | O4(#1) | 85.57(11)  | N3  | Mn1    | N1     | 119.35(12) |
| N3  | Mn1    | N2     | 71.86(10)  |     |        |        |            |

Symmetry codes:

(#1) +x,1+y,+z;

---

**4**

---

|     |     |    |            |     |     |    |            |
|-----|-----|----|------------|-----|-----|----|------------|
| Mn1 | O1  |    | 2.1659(16) | Mn1 | O4  |    | 2.2693(15) |
| Mn1 | O5  |    | 2.2692(14) | Mn1 | N2  |    | 2.4352(17) |
| Mn1 | N3  |    | 2.3121(18) | Mn1 | N1  |    | 2.2611     |
| O1  | Mn1 | O4 | 101.61(6)  | O1  | Mn1 | O5 | 125.51(6)  |
| O1  | Mn1 | N2 | 148.56(6)  | O1  | Mn1 | N3 | 82.37(6)   |
| O1  | Mn1 | N1 | 97.69(5)   | O4  | Mn1 | N2 | 92.39(6)   |
| O4  | Mn1 | N3 | 86.76(6)   | O5  | Mn1 | O4 | 58.05(5)   |
| O5  | Mn1 | N2 | 85.77(5)   | O5  | Mn1 | N3 | 136.83(6)  |
| N3  | Mn1 | N2 | 70.35(6)   | N1  | Mn1 | O4 | 160.38(5)  |
| N1  | Mn1 | O5 | 107.22(5)  | N1  | Mn1 | N2 | 72.50(5)   |
| N1  | Mn1 | N3 | 99.33(5)   |     |     |    |            |

---

**5**

---

|     |     |    |            |     |     |    |            |
|-----|-----|----|------------|-----|-----|----|------------|
| Mn1 | O1  |    | 2.1108(12) | Mn1 | O4  |    | 2.0888(13) |
| Mn1 | O6  |    | 2.2209(13) | Mn1 | N1  |    | 2.2655(14) |
| Mn1 | N2  |    | 2.3544(14) | Mn1 | N3  |    | 2.2303(14) |
| O1  | Mn1 | O6 | 94.07(5)   | O1  | Mn1 | N1 | 174.70(5)  |
| O1  | Mn1 | N2 | 102.82(5)  | O1  | Mn1 | N3 | 87.72(6)   |
| O4  | Mn1 | O1 | 90.18(6)   | O4  | Mn1 | O6 | 89.40(6)   |
| O4  | Mn1 | N1 | 87.95(6)   | O4  | Mn1 | N2 | 98.53(5)   |
| O4  | Mn1 | N3 | 171.99(5)  | O6  | Mn1 | N1 | 90.87(5)   |
| O6  | Mn1 | N2 | 161.24(4)  | O6  | Mn1 | N3 | 98.45(5)   |
| N1  | Mn1 | N2 | 72.58(5)   | N3  | Mn1 | N1 | 93.46(5)   |
| N3  | Mn1 | N2 | 74.45(5)   |     |     |    |            |

**Table S1** Continued:

| 6   |     |    |            |     |     |            |           |
|-----|-----|----|------------|-----|-----|------------|-----------|
| Mn1 | O2  |    | 2.2512(14) | Mn1 | O6  | 2.1469(14) |           |
| Mn1 | O7  |    | 2.1446(14) | Mn1 | N1  | 2.3175(16) |           |
| Mn1 | N2  |    | 2.4155(16) | Mn1 | N3  | 2.3041(16) |           |
| O2  | Mn1 | N1 | 136.31(5)  | O2  | Mn1 | N2         | 152.15(5) |
| O2  | Mn1 | N3 | 81.82(5)   | O6  | Mn1 | O2         | 90.85(5)  |
| O6  | Mn1 | N1 | 90.64(5)   | O6  | Mn1 | N2         | 95.09(5)  |
| O6  | Mn1 | N3 | 87.95(5)   | O7  | Mn1 | O2         | 87.39(5)  |
| O7  | Mn1 | O6 | 175.02(5)  | O7  | Mn1 | N1         | 87.43(6)  |
| O7  | Mn1 | N2 | 88.62(5)   | O7  | Mn1 | N3         | 96.40(6)  |
| N1  | Mn1 | N2 | 70.93(6)   | N3  | Mn1 | N1         | 141.87(5) |
| N3  | Mn1 | N2 | 71.26(5)   |     |     |            |           |

**Table S2** Hydrogen bonding parameters in **1-6**.

| D-H-A             | d(D-H)/Å  | d(H-A)/Å  | d(D-A)/Å  | D-H-A/°   | symmetry    |
|-------------------|-----------|-----------|-----------|-----------|-------------|
| 1                 |           |           |           |           |             |
| O5 -- H5A .. O2   | 0.9000    | 1.9000    | 2.647(12) | 140.00    | .           |
| O5 -- H5B .. O4   | 0.9000    | 1.8700    | 2.696(14) | 152.00    | .           |
| C8 -- H8B .. O6   | 0.9800    | 2.5900    | 3.56(2)   | 169.00    | x,y,1+z     |
| C31 -- H31B .. O6 | 0.9800    | 2.3500    | 2.77(2)   | 106.00    | .           |
| 1a                |           |           |           |           |             |
| O5 -- H5A .. O2   | 0.8700    | 1.9500    | 2.678(3)  | 140.00    | .           |
| O5 -- H5B .. O3   | 0.8700    | 1.8900    | 2.686(2)  | 151.00    | -x,1-y,1-z  |
| 2                 |           |           |           |           |             |
| O5 -- H5A .. O4   | 0.8700    | 1.8900    | 2.677(4)  | 149.00    | x,y,1+z     |
| O5 -- H5B .. O2   | 0.8700    | 1.8600    | 2.651(4)  | 150.00    | .           |
| C25 -- H25 .. O6  | 0.9500    | 2.5300    | 3.404(6)  | 152.00    | -x,1-y,1-z  |
| C33 -- H33C .. O6 | 0.9800    | 2.4200    | 2.804(6)  | 103.00    | .           |
| 3                 |           |           |           |           |             |
| O5 -- H5 .. O2    | 0.8400    | 2.2700    | 2.978(9)  | 142.00    | .           |
| O6 -- H6A .. O3   | 0.8400    | 2.1300    | 2.938(7)  | 161.00    | .           |
| 5                 |           |           |           |           |             |
| O6 -- H6A .. O5   | 0.83(3)   | 1.91(3)   | 2.722(2)  | 167(3)    | .           |
| O6 -- H6B .. O2   | 0.89(3)   | 1.84(3)   | 2.688(2)  | 160(3)    | .           |
| 6                 |           |           |           |           |             |
| O6 -- H6A .. O9   | 0.820(19) | 1.894(19) | 2.708(2)  | 171(2)    | -1+x,y,z    |
| O6 -- H6B .. O1   | 0.824(19) | 1.935(19) | 2.753(2)  | 171.9(19) | -x,-y,1-z   |
| O7 -- H7A .. O2   | 0.78(3)   | 1.96(3)   | 2.738(2)  | 177(3)    | 1-x,-y,1-z  |
| O7 -- H7B .. O4   | 0.89(4)   | 1.75(4)   | 2.635(2)  | 175(3)    | x,y,-1+z    |
| O8 -- H8A .. O1   | 0.87(2)   | 1.98(2)   | 2.851(2)  | 172.4(18) | 1-x,-y,1-z  |
| O8 -- H8B .. O4   | 0.88(2)   | 1.91(2)   | 2.772(2)  | 166(2)    | 1-x,-y,2-z  |
| O9 -- H9A .. O10  | 0.87(2)   | 1.97(3)   | 2.806(3)  | 160(2)    | 2-x,1-y,1-z |
| O9 -- H9B .. O8   | 0.88(2)   | 1.89(2)   | 2.739(3)  | 163(2)    | .           |
| O10 -- H10B .. O5 | 0.88(3)   | 2.00(3)   | 2.826(3)  | 157(3)    | x,1+y,-1+z  |
